# Supplementary material for: Killing of Mycolic Acid-Containing Bacteria Aborted Induction of Antibiotic Production by Streptomyces in Combined-Culture
Source: PubMed Central journal article supplement (PMC4636228; doi:10.1371/journal.pone.0142372), 2015-11-06
Supplement: pone.0142372.s002.pdf [file pone.0142372.s002.pdf]

**S1 Table. Structures of mycolic acid (MA).**

| subtype       |     | structure              |
|---------------|-----|------------------------|
| Saturated MA  | A-1 | $C_3H_6O_3 + (CH_2)_n$ |
| Monoenoic MA  | A-2 | $C_3H_4O_3 + (CH_2)_n$ |
| Dienoic MA    | A-3 | $C_3H_2O_3 + (CH_2)_n$ |
| Trienoic MA   | A-4 | $C_3O_3 + (CH_2)_n$    |
| Tetraenoic MA | A-5 | $C_4O_3 + (CH_2)_n$    |
| Pentaenoic MA | A-6 | $C_5O_3 + (CH_2)_n$    |
